# Supplementary material
Source: PubMed Central journal article supplement (PMC1176450)
Supplement: 7600721s3.pdf [file 7600721s3.pdf]

Senoo-Matsuda et al.  
Suppl Table 2

| Genotype                                                              | Lifespan (days±SEM)   |                       |
|-----------------------------------------------------------------------|-----------------------|-----------------------|
|                                                                       | Mean                  | Maximum               |
| <i>elav-GAL4/Y; UAS-lacZ-IR/+</i>                                     | 71.1±3.9              | 94.7±4.0              |
| <i>elav-GAL4/Y; UAS-drob-1-IR#3/+</i>                                 | 46.2±2.1 <sup>a</sup> | 68.3±3.5 <sup>a</sup> |
| <i>elav-GAL4/Y; UAS-drob-1-IR#10/+</i>                                | 44.6±1.8 <sup>a</sup> | 65.7±3.1 <sup>a</sup> |
| <i>elav-GAL4/Y; UAS-lacZ/+</i>                                        | 72.3±1.3              | 93.3±1.5              |
| <i>elav-GAL4/Y; UAS-buffy/+</i>                                       | 63.6±4.7 <sup>b</sup> | 82.4±3.1 <sup>c</sup> |
| <i>elav-GAL4/Y; UAS-drob-1<sup>GS2263</sup>/+</i>                     | 78.3±2.3 <sup>b</sup> | 97.3±1.2 <sup>b</sup> |
| <i>+/Y; UAS-lacZ-IR/+</i>                                             | 70.4±2.0              | 96.3±0.6              |
| <i>+/Y; UAS-drob-1-IR#3/+</i>                                         | 70.1±3.2              | 96.7±1.5              |
| <i>+/Y; UAS-drob-1-IR#10/+</i>                                        | 69.8±2.8              | 95.7±1.5              |
| <i>+/Y; UAS-lacZ/+</i>                                                | 69.9±2.7              | 95.3±1.5              |
| <i>+/Y; UAS-buffy/+</i>                                               | 70.3±1.9              | 96.3±1.2              |
| <i>+/Y; UAS-drob-1<sup>GS2263</sup>/+</i>                             | 70.1±1.1              | 96.3±2.1              |
| <i>elav-GAL4/Y</i>                                                    | 69.9±1.0              | 95.3±1.5              |
| <i>elav-GAL4/Y; +/+; UAS-MJDtr-Q78(M)/+</i>                           | 7.9±0.2               | 17.3±0.6              |
| <i>elav-GAL4/Y; UAS-drob-1-IR#10/+; UAS-MJDtr-Q78(M)/+</i>            | 5.3±0.9 <sup>d</sup>  | 12.0±1.0 <sup>d</sup> |
| <i>elav-GAL4/Y; UAS-buffy/+; UAS-MJDtr-Q78(M)/+</i>                   | 6.7±0.7 <sup>d</sup>  | 12.3±2.1 <sup>d</sup> |
| <i>elav-GAL4/Y; UAS-drob-1<sup>GS2263</sup>/+; UAS-MJDtr-Q78(M)/+</i> | 15.7±1.1 <sup>f</sup> | 26.7±1.5 <sup>e</sup> |
| <i>elav-GAL4/+</i>                                                    | 70.9±2.5              | 96.3±1.2              |
| <i>elav-GAL4/+; +/+; UAS-MJDtr-Q78(M)/+</i>                           | 11.8±0.4              | 21.7±1.5              |
| <i>elav-GAL4/+; UAS-drob-1-IR#10/+; UAS-MJDtr-Q78(M)/+</i>            | 7.8±0.5 <sup>f</sup>  | 15.7±1.2 <sup>f</sup> |
| <i>elav-GAL4/+; UAS-buffy/+; UAS-MJDtr-Q78(M)/+</i>                   | 9.5±0.7 <sup>d</sup>  | 16.3±1.5 <sup>d</sup> |
| <i>elav-GAL4/+; UAS-drob-1<sup>GS2263</sup>/+; UAS-MJDtr-Q78(M)/+</i> | 20.4±0.9 <sup>f</sup> | 36.3±1.5 <sup>e</sup> |
