# Supplementary material
Source: PubMed Central journal article supplement (PMC1176450)

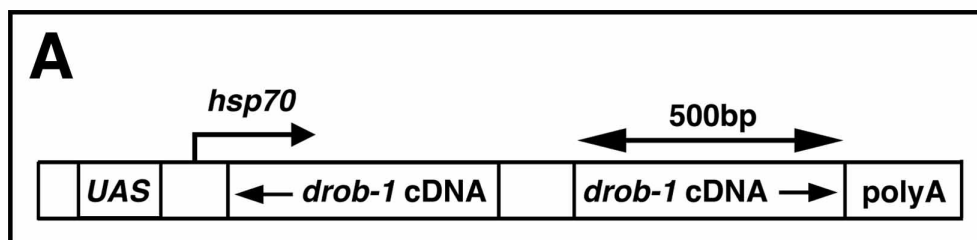

GMR-GAL4

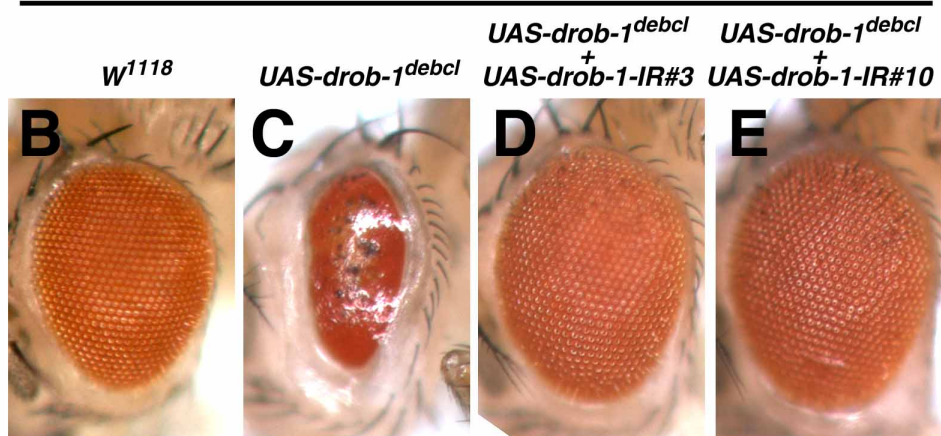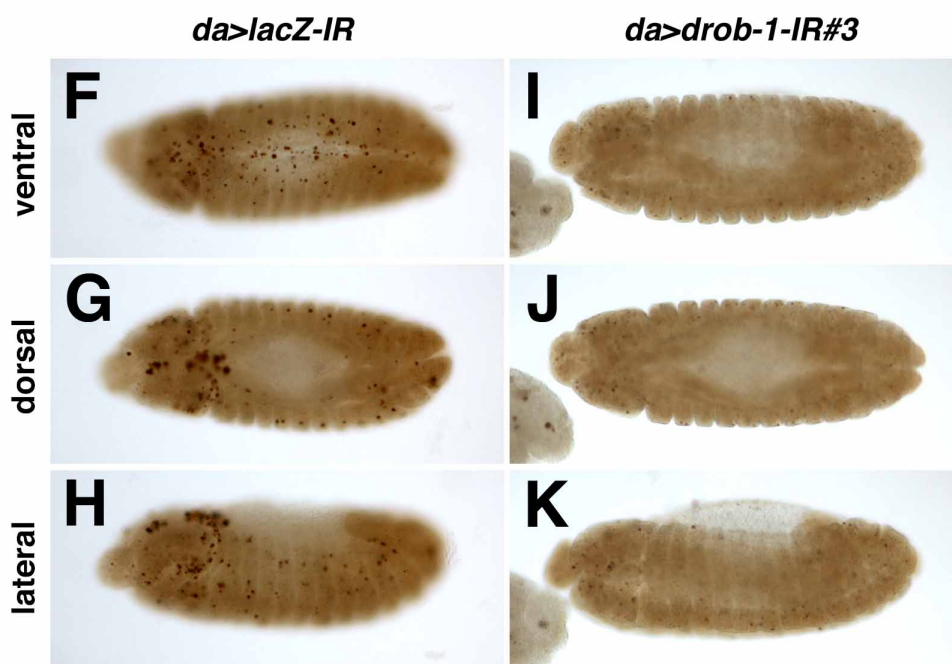

Supplement: 7600721s2.pdf [file 7600721s2.pdf]

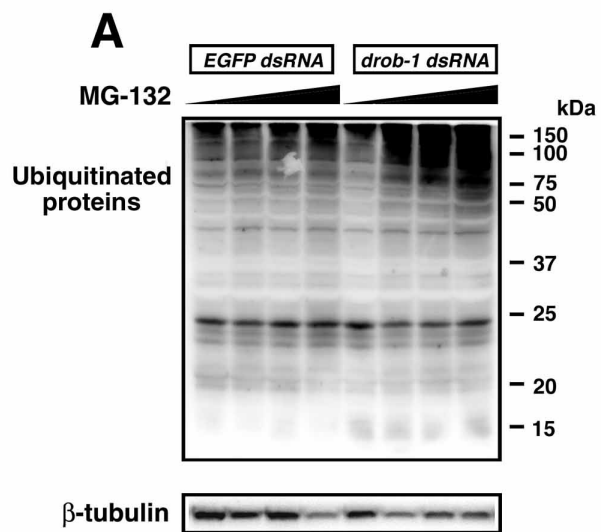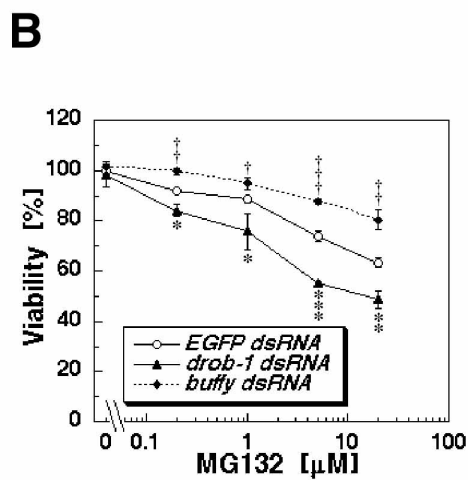

Supplement: 7600721s7.pdf [file 7600721s7.pdf]
